# Supplementary material
Source: PubMed Central journal article supplement (PMC327142)

**A**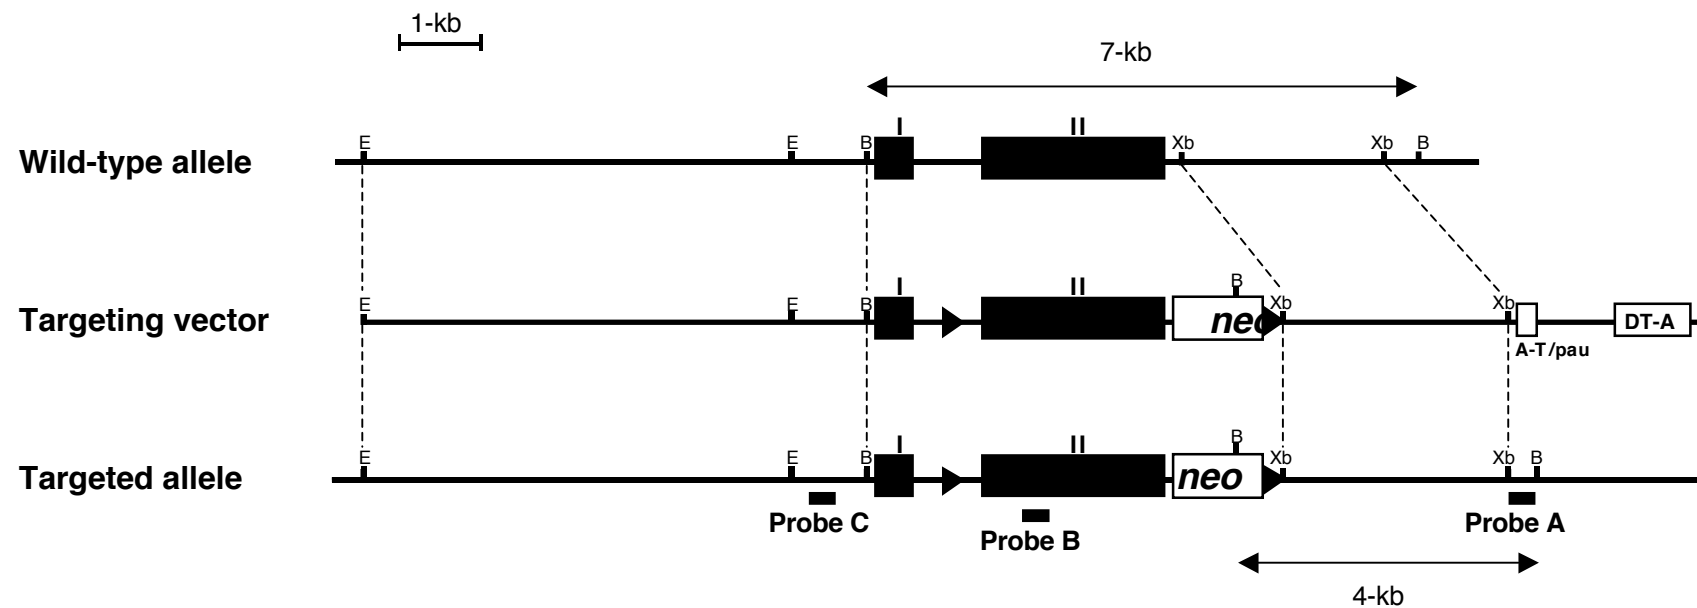**B**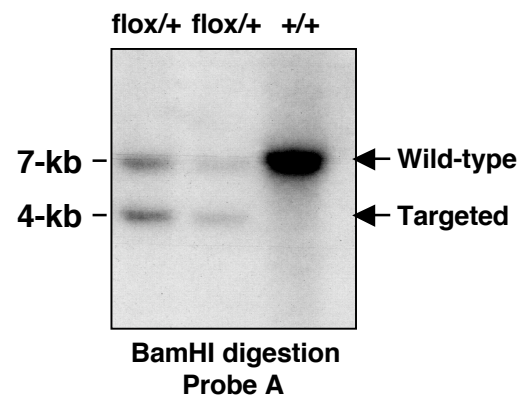**C**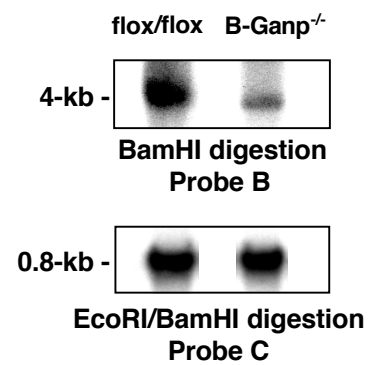**D**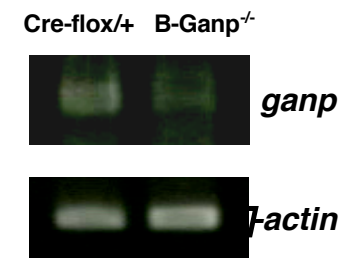

**Supporting Figure 3**

**E**

**Cre-flox/+**

**B-Ganp<sup>-/-</sup>**

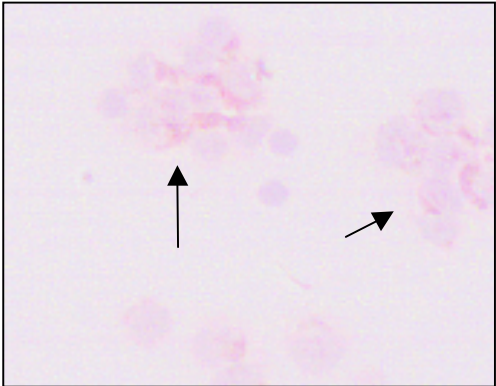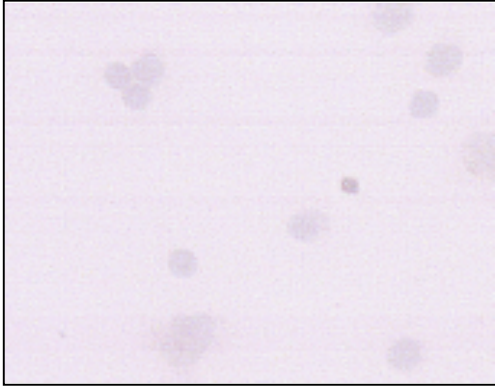

**Anti-CD40 stimulation**

# Supporting Figure 3

F

Cre-flox/+

Bone marrow

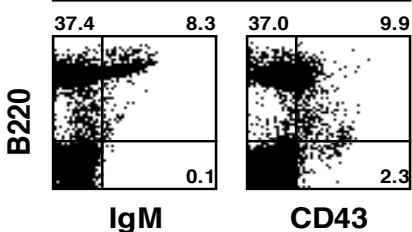

Spleen

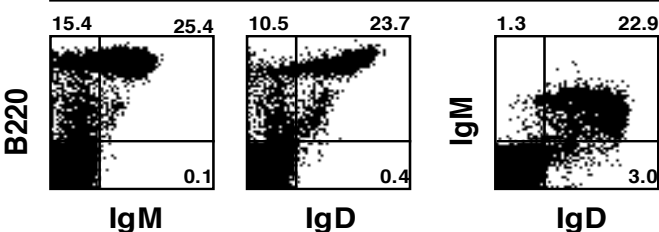

Lymph node

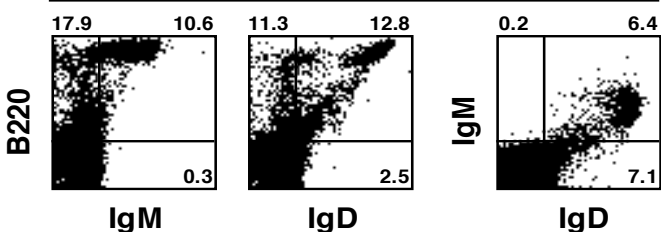

B-Ganp<sup>-/-</sup>

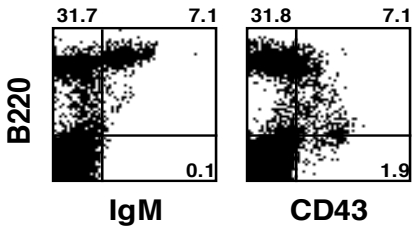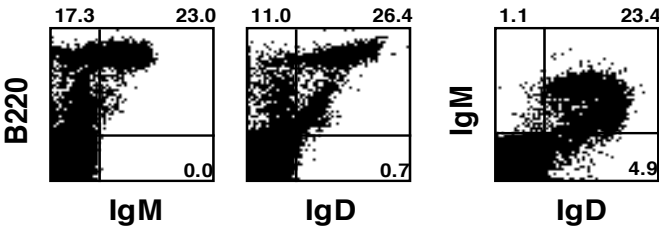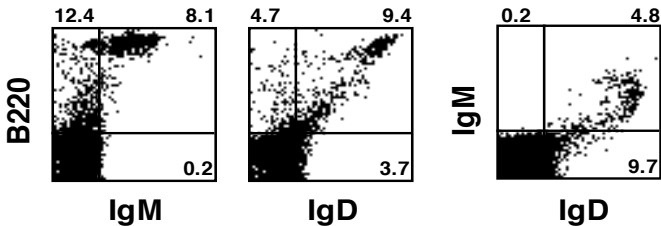

Supporting Figure 3

G

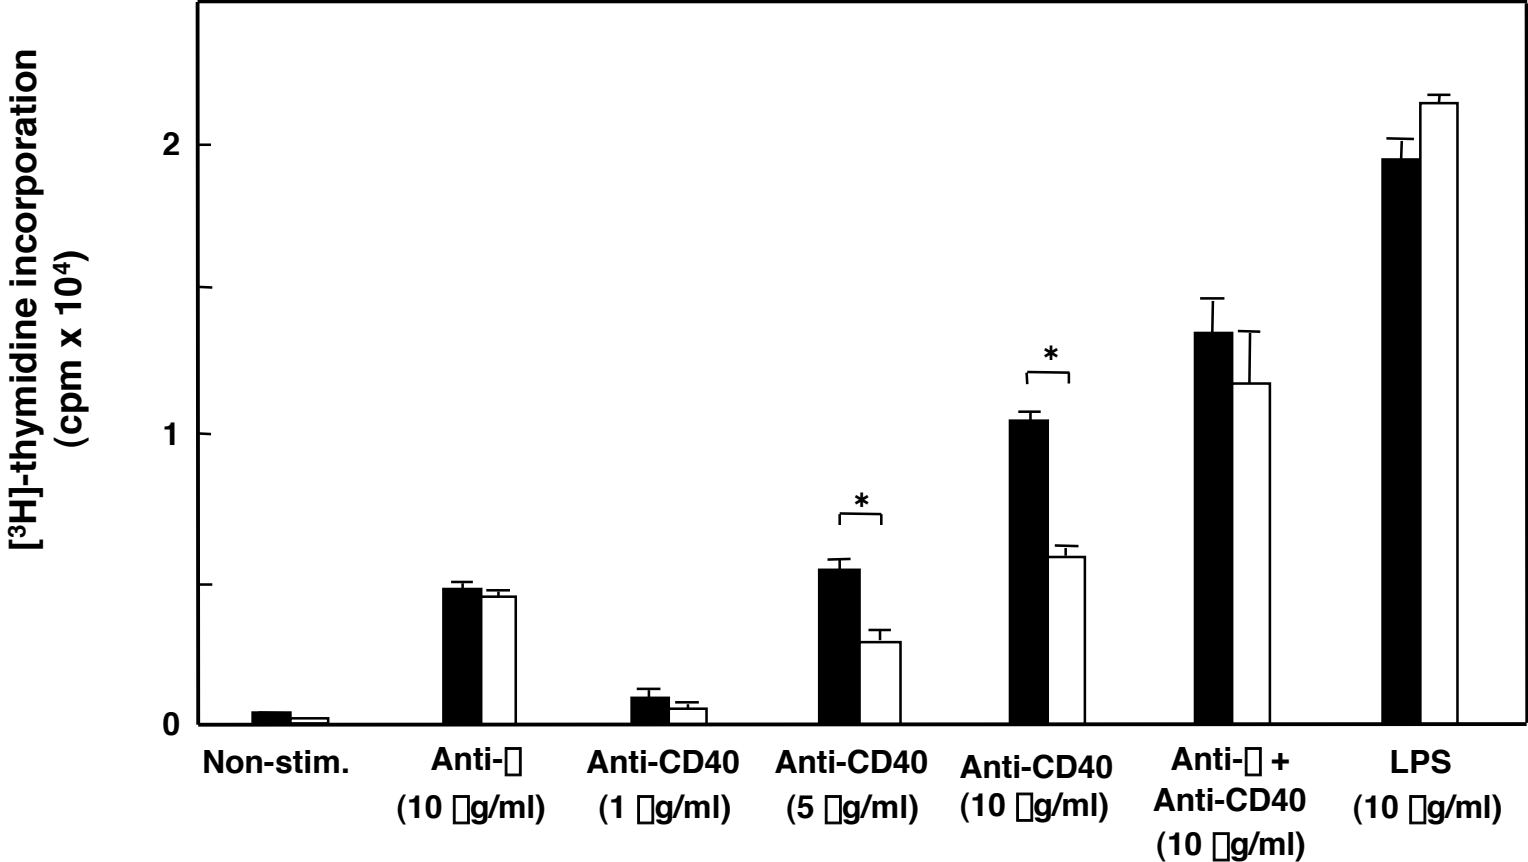

Supporting Figure 3

H

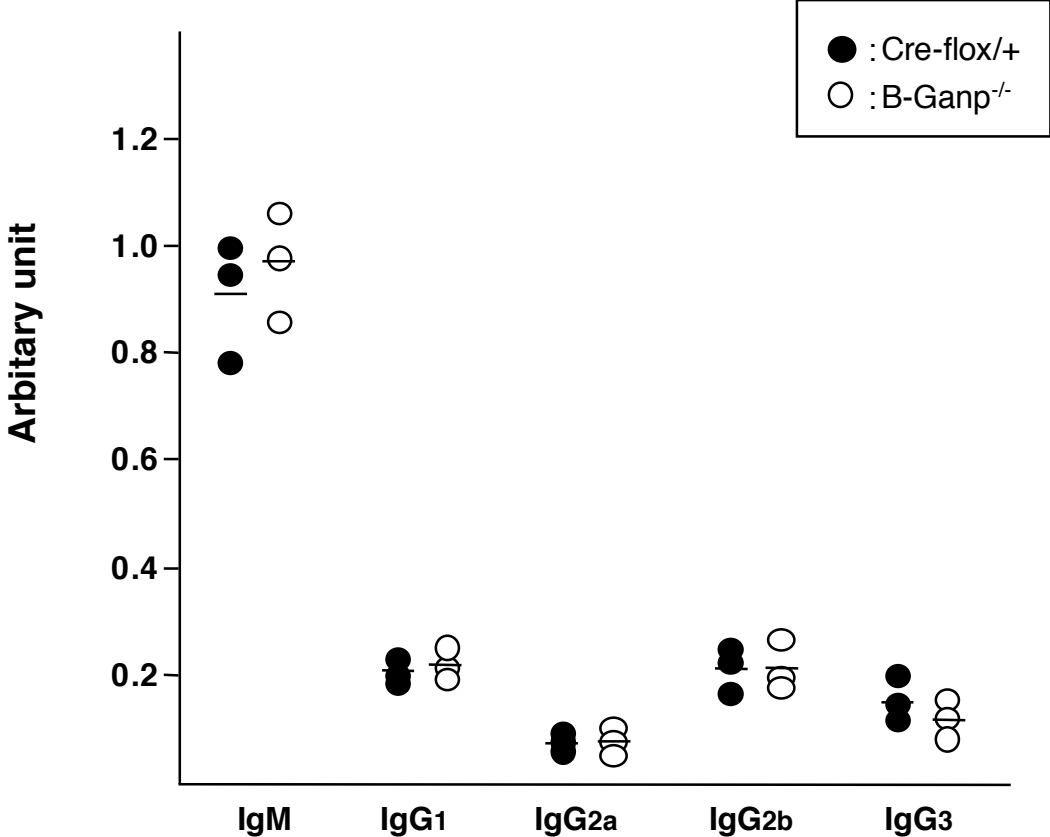

Supplement: pnas_0307609100_2.pdf [file pnas_0307609100_2.pdf]
