# Supplementary material
Source: PubMed Central journal article supplement (PMC327142)

**A**

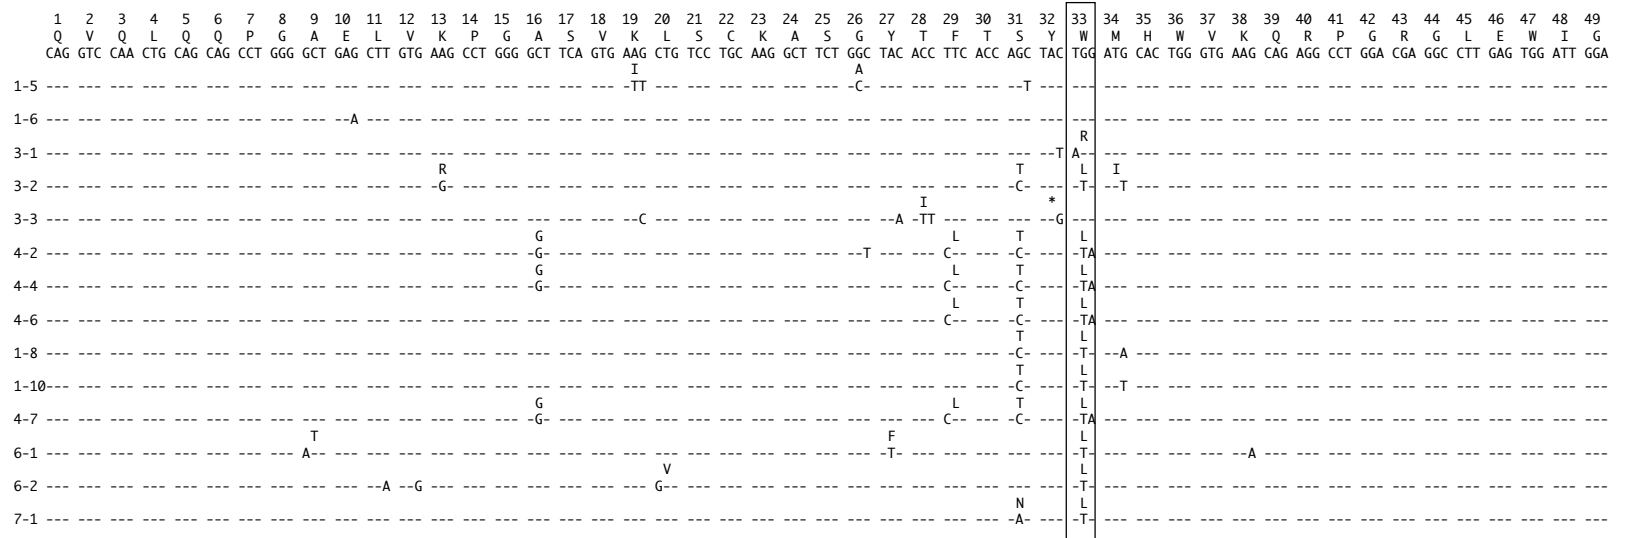

**Cre-flox/+**

**B-Gap<sup>-/-</sup>**

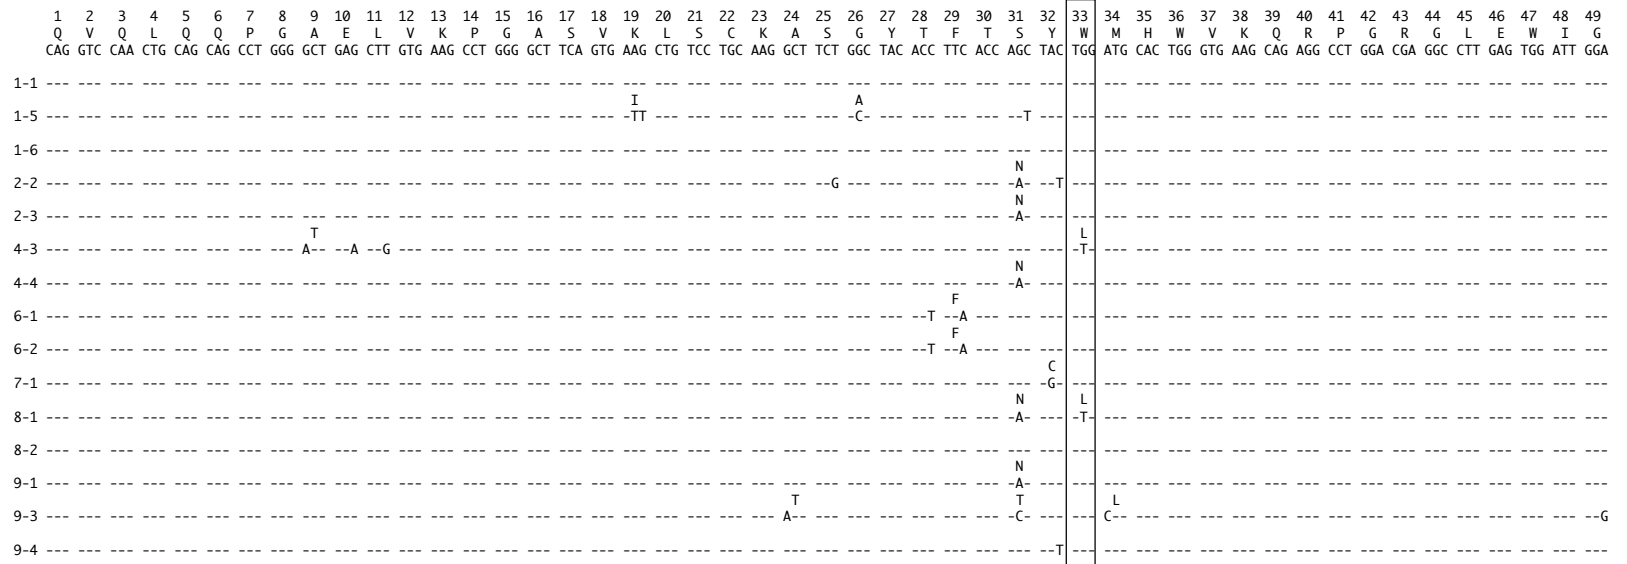

50 51 52 53 54 55 56 57 58 59 60 61 62 63 64 65 66 67 68 69 70 71 72 73 74 75 76 77 78 79 80 81 82 83 84 85 86 87 88 89 90 91 92 93 94 95 96 97 98  
 R I D P N S G G T K Y N E K F K S K A T L T V D K P S S T A Y M Q L S S L T S E D S A V Y Y C A R  
 AGG ATT GAT CCT AAT AGT GGT GGT ACT AAG TAC AAT GAG AAG TTC AAG AGC AAG GCC ACA CTG ACT GTA GAC AAA CCC TCC AGC ACA GCC TAC ATG CAG CTC AGC AGC CTG ACA TCT GAG GAC TCT GCG GTC TAT TAT TGT GCA AGA

1-5 -----  
 1-6 -----  
 3-1 -----  
 3-2 -----  
 3-3 -----  
 4-2 -----  
 4-4 -----  
 4-6 -----  
 1-8 -----  
 1-10 -----  
 4-7 -----  
 6-1 -----  
 6-2 -----  
 7-1 -----

**Cre-flox/+**

50 51 52 53 54 55 56 57 58 59 60 61 62 63 64 65 66 67 68 69 70 71 72 73 74 75 76 77 78 79 80 81 82 83 84 85 86 87 88 89 90 91 92 93 94 95 96 97 98  
 R I D P N S G G T K Y N E K F K S K A T L T V D K P S S T A Y M Q L S S L T S E D S A V Y Y C A R  
 AGG ATT GAT CCT AAT AGT GGT GGT ACT AAG TAC AAT GAG AAG TTC AAG AGC AAG GCC ACA CTG ACT GTA GAC AAA CCC TCC AGC ACA GCC TAC ATG CAG CTC AGC AGC CTG ACA TCT GAG GAC TCT GCG GTC TAT TAT TGT GCA AGA

1-1 -----  
 1-5 -----  
 1-6 -----  
 2-2 -----  
 2-3 -----  
 4-3 -----  
 4-4 -----  
 6-1 -----  
 6-2 -----  
 7-1 -----  
 8-1 -----  
 8-2 -----  
 9-1 -----  
 9-3 -----  
 9-4 -----

**B-Ganp<sup>-/-</sup>**



**C**

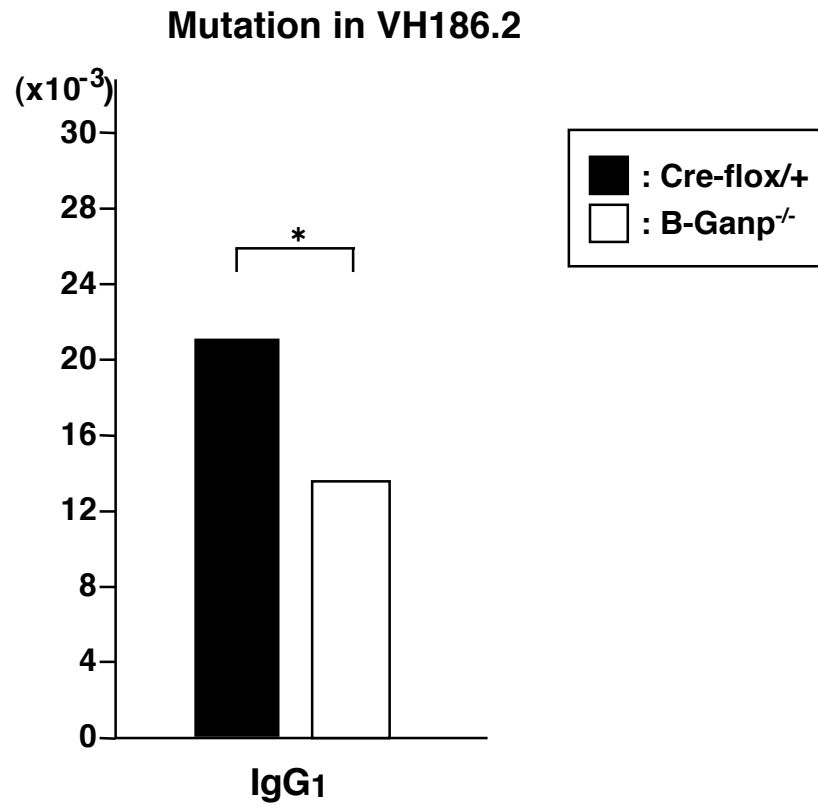

**D**

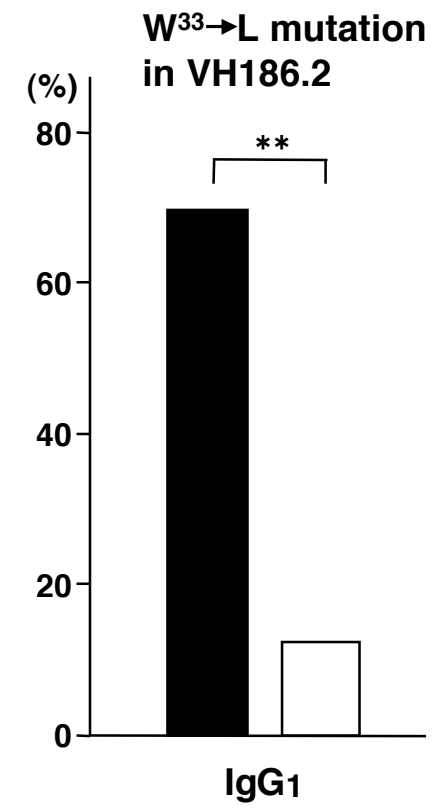

Supplement: pnas_0307609100_4.pdf [file pnas_0307609100_4.pdf]
