# Supplementary material
Source: PubMed Central journal article supplement (PMC327142)
Supplement: pnas_0307609100_7.pdf [file pnas_0307609100_7.pdf]

**Cre-flox/+**

|      |   | To |    |    |    |
|------|---|----|----|----|----|
|      |   | A  | G  | C  | T  |
| From | A |    | 18 | <2 | 5  |
|      | G | 21 |    | 8  | 12 |
|      | C | 3  | <2 |    | 18 |
|      | T | <2 | 3  | 10 |    |

**B-Ganp<sup>-/-</sup>**

|      |   | To |   |    |    |
|------|---|----|---|----|----|
|      |   | A  | G | C  | T  |
| From | A |    | 9 | 3  | 5  |
|      | G | 31 |   | 14 | 12 |
|      | C | <2 | 4 |    | 8  |
|      | T | 3  | 3 | 6  |    |
